# Supplementary material
Source: PubMed Central journal article supplement (PMC1994980)
Supplement: pcbi.0030177.sd001.pdf [file pcbi.0030177.sd001.pdf]

## Dataset S1

Here we include the dataset compiled for the analysis of this paper.

The first column lists the citation from which the data was extracted.

The second column lists the channel type  $xNa_v1.y$ ; the first variable ‘x’ is either ‘r, h, m’ for rat, human or mouse. The second variable ‘y’ is a number 1 . . . 9 denoting the specific channel type.

The third column lists whether the channel expressed is wild type or mutant. The mutant channels are characterized in the fashion they are described in the correspondingly cited paper: DX denotes that there is a mutation in domain ‘X’; IFMQ3 denotes a mutation in the inactivation sequence; other notations specify the amino acid substitution directly.

The fourth column specifies the conditions under which the channel is expressed, as characterized in the correspondingly cited paper. The conditions include with or without  $\beta$  subunits, or other external conditions. It should not be assumed that the descriptor here is a full summary of the conditions under which the channel was expressed: for example unless we explicitly state that no  $\beta$  subunits are expressed, they may or may not be expressed.

Finally the next four columns denote the  $V_{1/2}^{\text{act}}, k^{\text{act}}, V_{1/2}^{\text{inact}}, k^{\text{inact}}$ . If the column is blank there was no measurement of this quantity reported.

We note that for publications [9-21], we digitized and fit the data to a Boltzmann curve ourselves; the error bars in these cases reflect 95% confidence intervals with respect to our fits. For the remaining publications [22-48] we report the fits (and error bars) given by the authors of the corresponding publication.

| Citation | Channel | WT/mutant | Conditions             | $V_{1/2}^{\text{act}}$ (mV) | $k^{\text{act}}$ (mV) | $V_{1/2}^{\text{inact}}$ (mV) | $k^{\text{inact}}$ (mV) |
|----------|---------|-----------|------------------------|-----------------------------|-----------------------|-------------------------------|-------------------------|
| [1]      | rNav1.2 | WT        | no $\beta$             | —                           | —                     | -38.31 $\pm$ 0.04             | 8.08 $\pm$ 0.03         |
| [1]      | rNav1.2 | WT        | $\beta$ 1              | —                           | —                     | -44.96 $\pm$ 0.08             | 6.68 $\pm$ 0.07         |
| [1]      | rNav1.2 | WT        | P0                     | —                           | —                     | -40.78 $\pm$ 0.06             | 9.22 $\pm$ 0.04         |
| [1]      | rNav1.2 | WT        | $\beta$ 1P0 $\beta$ 1  | —                           | —                     | -48.73 $\pm$ 0.06             | 7.86 $\pm$ 0.06         |
| [1]      | rNav1.2 | WT        | P0 $\beta$ 1P0         | —                           | —                     | -39.63 $\pm$ 0.05             | 8.61 $\pm$ 0.04         |
| [1]      | rNav1.2 | WT        | $\beta$ 1P0P0          | —                           | —                     | -49.84 $\pm$ 0.06             | 7.18 $\pm$ 0.05         |
| [1]      | rNav1.2 | WT        | P0 $\beta$ 1 $\beta$ 1 | —                           | —                     | -35.38 $\pm$ 0.04             | 8.31 $\pm$ 0.03         |
| [2]      | rNav1.1 | WT        | no $\beta$             | -16.82 $\pm$ 0.21           | 5.66 $\pm$ 0.12       | -34.93 $\pm$ 0.10             | 5.58 $\pm$ 0.08         |
| [2]      | rNav1.2 | WT        | no $\beta$             | -18.38 $\pm$ 0.27           | 5.56 $\pm$ 0.20       | -41.80 $\pm$ 0.14             | 7.22 $\pm$ 0.08         |
| [2]      | rNav1.1 | WT        | $\beta$ 1 + $\beta$ 2  | -15.17 $\pm$ 0.08           | 6.50 $\pm$ 0.08       | -40.96 $\pm$ 0.09             | 5.28 $\pm$ 0.08         |
| [2]      | rNav1.2 | WT        | $\beta$ 1 + $\beta$ 2  | -21.60 $\pm$ 0.15           | 6.08 $\pm$ 0.10       | -57.24 $\pm$ 0.13             | 5.29 $\pm$ 0.09         |
| [3]      | rNav1.1 | WT        | no $\beta$             | -14.96 $\pm$ 0.14           | 6.30 $\pm$ 0.08       | -31.75 $\pm$ 0.11             | 7.09 $\pm$ 0.07         |
| [3]      | rNav1.1 | WT        | $\beta$ 1              | -14.7 $\pm$ 0.14            | 6.44 $\pm$ 0.09       | -33.98 $\pm$ 0.13             | 8.22 $\pm$ 0.08         |
| [3]      | rNav1.1 | DII       | no $\beta$             | -19.49 $\pm$ 0.11           | 5.76 $\pm$ 0.07       | -32.37 $\pm$ 0.09             | 8.22 $\pm$ 0.09         |
| [3]      | rNav1.1 | DII       | $\beta$ 1              | -15.17 $\pm$ 0.14           | 6.18 $\pm$ 0.09       | -34.19 $\pm$ 0.12             | 7.96 $\pm$ 0.07         |
| [3]      | rNav1.1 | DIV       | no $\beta$             | -16.87 $\pm$ 0.18           | 5.70 $\pm$ 0.09       | -38.04 $\pm$ 0.10             | 8.79 $\pm$ 0.06         |
| [3]      | rNav1.1 | DIV       | $\beta$ 1              | -16.23 $\pm$ 0.16           | 6.37 $\pm$ 0.10       | -33.98 $\pm$ 0.13             | 8.22 $\pm$ 0.08         |
| [4]      | rNav1.2 | IFMQ3     | no $\beta$             | -24.71 $\pm$ 0.07           | 4.01 $\pm$ 0.06       | —                             | —                       |
| [4]      | rNav1.2 | IFMQ3     | $\beta$ 1              | -26.00 $\pm$ 0.06           | 3.71 $\pm$ 0.05       | —                             | —                       |
| [4]      | rNav1.3 | WT        | no $\beta$             | —                           | —                     | -22.5 $\pm$ 0.08              | 6.15 $\pm$ 0.07         |
| [4]      | rNav1.3 | WT        | $\beta$ 1              | —                           | —                     | -32.23 $\pm$ 0.10             | 7.92 $\pm$ 0.09         |
| [5]      | mNav1.6 | WT        | no $\beta$             | -8.49 $\pm$ 0.14            | 6.70 $\pm$ 0.08       | -54.72 $\pm$ 0.13             | 7.28 $\pm$ 0.08         |

| Citation | Channel | WT/mutant | Conditions          | $V_{1/2}^{\text{act}}$ (mV) | $k^{\text{act}}$ (mV) | $V_{1/2}^{\text{inact}}$ (mV) | $k^{\text{inact}}$ (mV) |
|----------|---------|-----------|---------------------|-----------------------------|-----------------------|-------------------------------|-------------------------|
| [5]      | mNav1.6 | WT        | $\beta 1 + \beta 2$ | $-17.05 \pm 0.17$           | $6.29 \pm 0.10$       | $-50.89 \pm 0.07$             | $4.76 \pm 0.05$         |
| [5]      | rNav1.1 | WT        | no $\beta$          | $-16.58 \pm 0.18$           | $5.56 \pm 0.11$       | $-35.96 \pm 0.10$             | $5.08 \pm 0.06$         |
| [5]      | rNav1.1 | WT        | $\beta 1 + \beta 2$ | $-15.36 \pm 0.10$           | $6.73 \pm 0.09$       | $-40.70 \pm 0.08$             | $5.00 \pm 0.06$         |
| [5]      | rNav1.2 | WT        | no $\beta$          | $-17.99 \pm 0.20$           | $5.52 \pm 0.11$       | $-42.71 \pm 0.14$             | $7.04 \pm 0.10$         |
| [5]      | rNav1.2 | WT        | $\beta 1 + \beta 2$ | $-21.42 \pm 0.15$           | $5.71 \pm 0.1$        | $-57.34 \pm 0.14$             | $5.21 \pm 0.1$          |
| [6]      | rNav1.2 | WT        | no $\beta$          | $-15.12 \pm 0.34$           | $4.77 \pm 0.44$       | $-25.28 \pm 0.06$             | $7.28 \pm 0.06$         |
| [6]      | rNav1.2 | WT        | $\beta 1$           | $-23.19 \pm 0.61$           | $4.03 \pm 0.43$       | $-43.92 \pm 0.08$             | $7.69 \pm 0.07$         |
| [7]      | rNav1.3 | WT        | no $\beta$          | $-31.83 \pm 0.09$           | $5.15 \pm 0.07$       | $-64.9 \pm 0.09$              | $8.30 \pm 0.08$         |
| [7]      | rNav1.3 | WT        | $\beta 3$           | $-24.20 \pm 0.05$           | $5.76 \pm 0.04$       | $-56.99 \pm 0.07$             | $6.19 \pm 0.08$         |
| [8]      | hNav1.6 | WT        | no $\beta$          | $-28.69 \pm 0.10$           | $6.77 \pm 0.06$       | $-71.87 \pm 0.10$             | $7.65 \pm 0.06$         |
| [9]      | hNav1.7 | WT        | $\beta 1 + \beta 2$ | $-28.94 \pm 0.05$           | $5.35 \pm 0.04$       | —                             | —                       |
| [9]      | hNav1.7 | I848T     | $\beta 1 + \beta 2$ | $-40.86 \pm 0.05$           | $4.83 \pm 0.05$       | —                             | —                       |
| [9]      | hNav1.7 | L858H     | $\beta 1 + \beta 2$ | $-43.63 \pm 0.04$           | $5.99 \pm 0.04$       | —                             | —                       |
| [10]     | hNav1.3 | WT        | no $\beta$          | —                           | —                     | $-61.99 \pm 0.15$             | $5.06 \pm 0.07$         |
| [11]     | hNav1.4 | WT        | no $\beta$          | $-42.49 \pm 0.05$           | $4.34 \pm 0.05$       | $-80.15 \pm 0.08$             | $5.96 \pm 0.06$         |
| [11]     | hNav1.4 | R672G     | no $\beta$          | $-42.33 \pm 0.06$           | $6.00 \pm 0.05$       | $-90.17 \pm 0.07$             | $5.73 \pm 0.06$         |
| [11]     | hNav1.4 | R672H     | no $\beta$          | $-45.99 \pm 0.06$           | $5.93 \pm 0.05$       | $-87.58 \pm 0.07$             | $6.60 \pm 0.06$         |
| [12]     | hNav1.5 | WT        | $\beta 1$           | $-41.80 \pm 0.05$           | $6.77 \pm 0.04$       | —                             | —                       |
| [12]     | hNav1.5 | MUTANT    | $\beta 1$           | $-50.25 \pm 0.06$           | $5.96 \pm 0.04$       | —                             | —                       |
| [13]     | mNav1.6 | WT        |                     | $-27.15 \pm 0.06$           | $7.06 \pm 0.05$       | $-65.71 \pm 0.10$             | $7.99 \pm 0.08$         |
| [13]     | mNav1.7 | WT        |                     | $-33.34 \pm 0.09$           | $6.79 \pm 0.07$       | $-73.53 \pm 0.14$             | $8.11 \pm 0.12$         |
| [14]     | hNav1.1 | WT        | $\beta 1 + \beta 2$ | $-26.4 \pm 2.3$             | $7.1 \pm 0.2$         | $-67.5 \pm 2.3$               | $6.2 \pm 0.3$           |

| Citation | Channel | WT/mutant | Conditions                        | $V_{1/2}^{\text{act}}$ (mV) | $k^{\text{act}}$ (mV) | $V_{1/2}^{\text{inact}}$ (mV) | $k^{\text{inact}}$ (mV) |
|----------|---------|-----------|-----------------------------------|-----------------------------|-----------------------|-------------------------------|-------------------------|
| [14]     | hNav1.1 | R1648H    | $\beta 1 + \beta 2$               | $-25.9 \pm 1.0$             | $7.1 \pm 0.2$         | $-69.1 \pm 2.1$               | $6.5 \pm 0.4$           |
| [14]     | hNav1.1 | T875M     | $\beta 1 + \beta 2$               | $-26.1 \pm 1.2$             | $7.1 \pm 0.2$         | $-60.7 \pm 1.1$               | $5.9 \pm 0.6$           |
| [14]     | hNav1.1 | W1204R    | $\beta 1 + \beta 2$               | $-29.6 \pm 1.2$             | $7.1 \pm 0.2$         | $-72.0 \pm 2.0$               | $6.9 \pm 0.4$           |
| [15]     | hNav1.1 | WT        | $\beta 1 + \beta 2$               | $-23.6 \pm 1.2$             | $7.4 \pm 0.3$         | $-64.2 \pm 1.1$               | $5.8 \pm 0.1$           |
| [15]     | hNav1.1 | R1648C    | $\beta 1 + \beta 2$               | $-19.7 \pm 0.6$             | $9.2 \pm 0.6$         | $-71.3 \pm 0.2$               | $7.7 \pm 0.2$           |
| [15]     | hNav1.1 | F1661S    | $\beta 1 + \beta 2$               | $-23.5 \pm 0.4$             | $7.5 \pm 0.3$         | $-52.0 \pm 0.4$               | $7.1 \pm 0.4$           |
| [15]     | hNav1.1 | G1749E    | $\beta 1 + \beta 2$               | $-22.0 \pm 1.6$             | $7.6 \pm 0.3$         | $-66.4 \pm 1.1$               | $6.0 \pm 0.3$           |
| [16]     | hNav1.5 | WT        | $\beta 1$                         | $-48.6 \pm 1.2$             | $6.1 \pm 0.8$         | $-92.0 \pm 1.7$               | $5.4 \pm 0.3$           |
| [16]     | hNav1.5 | G514C     | $\beta 1$                         | $-38.5 \pm 1.4$             | $6.1 \pm 0.3$         | $-85.1 \pm 0.9$               | $5.2 \pm 0.3$           |
| [17]     | rNav1.2 | WT        | no $\beta$                        | —                           | —                     | $-45.1 \pm 0.3$               | $9.8 \pm 0.2$           |
| [17]     | rNav1.2 | WT        | $\beta 1$                         | —                           | —                     | $-49.1 \pm 0.3$               | $5.9 \pm 0.2$           |
| [17]     | rNav1.2 | WT        | $\beta 3$                         | —                           | —                     | $-49.3 \pm 0.2$               | $6.1 \pm 0.1$           |
| [18]     | hNav1.5 | WT        | no $\beta$                        | $-50.1 \pm 0.7$             | $5.5 \pm 0.6$         | $-97.0 \pm 2.3$               | $6.7 \pm 0.8$           |
| [18]     | hNav1.5 | WT        | $\beta 1$                         | $-42.2 \pm 0.8$             | $5.3 \pm 0.2$         | $-75.0 \pm 2.7$               | $5.5 \pm 0.5$           |
| [19]     | hNav1.2 | WT        |                                   | $-24.2 \pm 2.0$             | $7.8 \pm 0.5$         | $-63.1 \pm 1.0$               | $4.4 \pm 0.2$           |
| [20]     | rNav1.8 | WT        |                                   | -23.8                       | 6.8                   | —                             | —                       |
| [21]     | hNav1.5 | WT        | cocaethylene (10 $\mu\text{M}$ )  | —                           | —                     | $-78.6 \pm 0.1$               | $4.8 \pm 0.1$           |
| [21]     | hNav1.5 | WT        | cocaethylene (25 $\mu\text{M}$ )  | —                           | —                     | $-80.8 \pm 0.1$               | $5.0 \pm 0.1$           |
| [21]     | hNav1.5 | WT        | cocaethylene (50 $\mu\text{M}$ )  | —                           | —                     | $-82.1 \pm 0.2$               | $4.9 \pm 0.1$           |
| [21]     | hNav1.5 | WT        | cocaethylene (150 $\mu\text{M}$ ) | —                           | —                     | $-84.1 \pm 0.1$               | $5.0 \pm 0.1$           |
| [22]     | rNav1.8 | WT        |                                   | $10.3 \pm 1.2$              | $6.6 \pm 0.4$         | $-52.9 \pm 0.8$               | $8.9 \pm 0.2$           |

| Citation | Channel | WT/mutant | Conditions                                     | $V_{1/2}^{\text{act}}$ (mV) | $k^{\text{act}}$ (mV) | $V_{1/2}^{\text{inact}}$ (mV) | $k^{\text{inact}}$ (mV) |
|----------|---------|-----------|------------------------------------------------|-----------------------------|-----------------------|-------------------------------|-------------------------|
| [22]     | rNav1.8 | WT        | $\beta 1$                                      | $1.6 \pm 0.7$               | $6.3 \pm 0.1$         | $-58.4 \pm 1.5$               | $7.1 \pm 0.4$           |
| [22]     | rNav1.8 | WT        | $\beta 2$                                      | $9.5 \pm 0.8$               | $5.7 \pm 0.7$         | $-49.0 \pm 0.2$               | $9.9 \pm 0.5$           |
| [22]     | rNav1.8 | WT        | $\beta 3$                                      | $11.5 \pm 1.1$              | $6.0 \pm 0.5$         | $-47.9 \pm 0.6$               | $9.0 \pm 0.5$           |
| [22]     | rNav1.8 | WT        | $\beta 1 + \beta 2$                            | $1.7 \pm 0.4$               | $6.7 \pm 0.2$         | $-46.6 \pm 0.9$               | $10.3 \pm 0.5$          |
| [22]     | rNav1.8 | WT        | $\beta 1 + \beta 3$                            | $2.9 \pm 0.9$               | $6.6 \pm 0.2$         | $-55.1 \pm 0.9$               | $8.7 \pm 0.4$           |
| [22]     | rNav1.8 | WT        | $\beta 2 + \beta 3$                            | $7.2 \pm 1.0$               | $8.0 \pm 0.6$         | $-51.3 \pm 1.2$               | $10.0 \pm 0.5$          |
| [22]     | rNav1.8 | WT        | $\beta 1 + \beta 2 + \beta 3$                  | $1.7 \pm 1.1$               | $6.6 \pm 0.3$         | $-54.4 \pm 1$                 | $8.9 \pm 0.4$           |
| [23]     | rNav1.7 | WT        | $\beta 1$                                      | $-25.6 \pm 1.5$             | $3.8 \pm 0.2$         | $-68.4 \pm 0.4$               | $4.4 \pm 0.1$           |
| [23]     | rNav1.7 | WT        | $\beta 1, \text{lidocaine (100 } \mu\text{M)}$ | $-23.9 \pm 1.9$             | $3.9 \pm 0.2$         | $-79.0 \pm 1.5$               | $5.5 \pm 0.2$           |
| [23]     | rNav1.8 | WT        | $\beta 1$                                      | $6.2 \pm 0.7$               | $5.7 \pm 0.2$         | $-42.7 \pm 1.2$               | $9.1 \pm 0.1$           |
| [23]     | rNav1.8 | WT        | $\beta 1, \text{lidocaine (100 } \mu\text{M)}$ | $12.3 \pm 1.8$              | $6.6 \pm 0.3$         | $-46.8 \pm 0.6$               | $8.1 \pm 0.2$           |
| [24]     | rNav1.7 | WT        | $\beta 1$                                      | $-27.9 \pm 0.8$             | $4.4 \pm 0.3$         | $-67.7 \pm 2.5$               | $6.4 \pm 0.6$           |
| [24]     | rNav1.7 | WT        | $\beta 1, \text{forskolin (1 } \mu\text{M)}$   | $-25.7 \pm 0.4$             | $4.3 \pm 0.3$         | $-68.3 \pm 3.3$               | $6.3 \pm 0.6$           |
| [24]     | rNav1.8 | WT        | $\beta 1$                                      | $-1.2 \pm 1.0$              | $5.2 \pm 0.1$         | $-60.5 \pm 2.7$               | $8.4 \pm 0.9$           |
| [24]     | rNav1.8 | WT        | $\beta 1, \text{forskolin (50 } \mu\text{M)}$  | $-0.3 \pm 1.9$              | $4.8 \pm 0.2$         | $-57.4 \pm 2.3$               | $9.2 \pm 0.6$           |
| [24]     | rNav1.7 | WT        | $\beta 1$                                      | $-27.5 \pm 1.3$             | $4.1 \pm 0.4$         | $-67.3 \pm 0.8$               | $5.5 \pm 0.2$           |
| [24]     | rNav1.7 | WT        | $\beta 1, \text{PMA (10 nM)}$                  | $-21.0 \pm 2.3$             | $4.0 \pm 0.2$         | $-66.1 \pm 1.4$               | $5.8 \pm 0.2$           |
| [24]     | rNav1.7 | WT        | $\beta 1$                                      | $-27.3 \pm 0.6$             | $4.3 \pm 0.1$         | $-61.9 \pm 0.9$               | $6.3 \pm 0.2$           |
| [24]     | rNav1.7 | WT        | $\beta 1, \text{PDBu (20 nM)}$                 | $-18.4 \pm 0.8$             | $5.0 \pm 0.1$         | $-63.8 \pm 2.9$               | $7.7 \pm 1.0$           |
| [24]     | rNav1.8 | WT        | $\beta 1$                                      | $-4.6 \pm 3.6$              | $6.4 \pm 0.5$         | $-63.6 \pm 1.4$               | $7.3 \pm 0.5$           |
| [24]     | rNav1.8 | WT        | $\beta 1, \text{PMA (2 nM)}$                   | $10.1 \pm 3.5$              | $6.9 \pm 0.2$         | $-57.6 \pm 3.0$               | $8.1 \pm 0.3$           |
| [24]     | rNav1.8 | WT        | $\beta 1$                                      | $-2.8 \pm 1.2$              | $6.2 \pm 0.2$         | $-61.1 \pm 0.7$               | $7.5 \pm 0.4$           |
| [24]     | rNav1.8 | WT        | $\beta 1, \text{PDBu (2 nM)}$                  | $14.3 \pm 2.1$              | $6.6 \pm 0.3$         | $-57.0 \pm 1.2$               | $8.7 \pm 0.3$           |

| Citation | Channel | WT/mutant | Conditions      | $V_{1/2}^{\text{act}}$ (mV) | $k^{\text{act}}$ (mV) | $V_{1/2}^{\text{inact}}$ (mV) | $k^{\text{inact}}$ (mV) |
|----------|---------|-----------|-----------------|-----------------------------|-----------------------|-------------------------------|-------------------------|
| [25]     | rNav1.9 | WT        | SNS, CsCl       | -21.4 ± 0.8                 | 6.7 ± 0.7             | -28.5 ± 0.6                   | 7.4 ± 0.5               |
| [25]     | rNav1.9 | WT        | SNS, CSF        | -22.0 ± 0.3                 | 6.2 ± 0.2             | -27.1 ± 0.2                   | 6.9 ± 0.2               |
| [25]     | rNav1.9 | WT        | NaN, CsCl       | -36.3 ± 0.2                 | 5.0 ± 0.1             | -43.0 ± 0.5                   | 7.3 ± 0.5               |
| [25]     | rNav1.9 | WT        | NaN, CsF        | -53.3 ± 0.3                 | 4.3 ± 0.2             | -58.5 ± 0.4                   | 7.7 ± 0.4               |
| [25]     | rNav1.9 | WT        | SNaC, CsCl      | -34.6 ± 0.4                 | 4.4 ± 0.2             | -40.5 ± 0.5                   | 7.8 ± 0.5               |
| [25]     | rNav1.9 | WT        | SNaC, CsF       | -54.5 ± 0.3                 | 4.5 ± 0.2             | -57.2 ± 0.7                   | 7.6 ± 0.6               |
| [26]     | hNav1.5 | WT        |                 | -50.4 ± 1.3                 | 5.6 ± 0.5             | -76.4 ± 1.2                   | 8.4 ± 0.5               |
| [26]     | hNav1.5 | WT        | FHF1B           | -46.2 ± 1.1                 | 5.8 ± 0.4             | -85.7 ± 1.4                   | 9.1 ± 0.2               |
| [26]     | hNav1.5 | D1790G    |                 | -40.3 ± 3.2                 | 8.7 ± 0.6             | -98.7 ± 2.8                   | 10.8 ± 1.1              |
| [26]     | hNav1.5 | D1790G    | FHF1B           | -41.9 ± 3.5                 | 10.6 ± 1.3            | -98.4 ± 2.9                   | 10.3 ± 1.7              |
| [27]     | hNav1.5 | WT        |                 | —                           | —                     | -73                           | 5.6                     |
| [27]     | hNav1.5 | WT        | 0.1 $\mu$ M TTX | —                           | —                     | -74                           | 5.8                     |
| [27]     | hNav1.5 | WT        | 3 $\mu$ M TTX   | —                           | —                     | -81                           | 5.8                     |
| [27]     | hNav1.5 | WT        | 10 $\mu$ M TTX  | —                           | —                     | -79                           | 5.8                     |
| [27]     | hNav1.5 | WT        | 30 $\mu$ M TTX  | —                           | —                     | -81                           | 5.7                     |
| [28]     | hNav1.5 | WT        |                 | -50.6 ± 1.3                 | 5.6 ± 0.3             | -93.1 ± 1.7                   | 5.0 ± 0.2               |
| [28]     | hNav1.4 | WT        |                 | -29.6 ± 1.6                 | 6.1 ± 0.4             | -72.8 ± 2.1                   | 5.9 ± 0.3               |
| [28]     | hNav1.2 | WT        |                 | -17.6 ± 2.9                 | 6.9 ± 0.7             | -58.9 ± 1.7                   | 5.5 ± 0.5               |
| [28]     | hNav1.7 | WT        |                 | -24.3 ± 3.0                 | 5.2 ± 0.2             | -78.4 ± 1.0                   | 5.4 ± 0.3               |
| [29]     | hNav1.5 | WT        | $\beta$         | -29.8 ± 0.4                 | 5.6 ± 0.4             | -64.0 ± 0.8                   | 5.6 ± 0.2               |
| [29]     | hNav1.5 | L619F     | $\beta$         | -29.9 ± 0.4                 | 4.7 ± 0.1             | -58.2 ± 1.1                   | 5.3 ± 0.2               |
| [30]     | rNav1.4 | WT        |                 | -22.8 ± 0.9                 | 6.4 ± 0.2             | -66.1 ± 0.6                   | 6.4 ± 0.2               |

| Citation | Channel | WT/mutant | Conditions                  | $V_{1/2}^{\text{act}}$ (mV) | $k^{\text{act}}$ (mV) | $V_{1/2}^{\text{inact}}$ (mV) | $k^{\text{inact}}$ (mV) |
|----------|---------|-----------|-----------------------------|-----------------------------|-----------------------|-------------------------------|-------------------------|
| [30]     | rNav1.4 | WT        | $\beta$ 1                   | $-23.9 \pm 1.2$             | $6.3 \pm 0.3$         | $-66.5 \pm 0.5$               | $6.3 \pm 0.2$           |
| [31]     | rNav1.4 | WT        | $V_{\text{hold}} = -60$ mV  | $-25.7 \pm 1.4$             | $7.8 \pm 0.9$         | $-58.3 \pm 1.7$               | $7.9 \pm 0.7$           |
| [31]     | rNav1.4 | WT        | $V_{\text{hold}} = -70$ mV  | $-30.9 \pm 1.0$             | $6.8 \pm 0.4$         | $-62.4 \pm 0.6$               | $10.1 \pm 0.8$          |
| [31]     | rNav1.4 | WT        | $V_{\text{hold}} = -85$ mV  | $-32.8 \pm 0.4$             | $7.0 \pm 0.4$         | $-68.9 \pm 0.7$               | $6.3 \pm 0.3$           |
| [31]     | rNav1.4 | WT        | $V_{\text{hold}} = -110$ mV | $-41.7 \pm 1.9$             | $7.6 \pm 0.3$         | $-74.3 \pm 0.8$               | $5.3 \pm 0.2$           |
| [31]     | rNav1.4 | WT        | $V_{\text{hold}} = -130$ mV | $-46.6 \pm 1.6$             | $7.0 \pm 0.4$         | $-79.2 \pm 1.0$               | $5.6 \pm 0.2$           |
| [32]     | rNav1.4 | WT        | —                           | —                           | —                     | $-72.6 \pm 1.0$               | $6.2 \pm 0.4$           |
| [32]     | rNav1.4 | WT        | steroid-treated             | —                           | —                     | $-72.4 \pm 1.2$               | $5.7 \pm 1.0$           |
| [32]     | rNav1.4 | WT        | denervated                  | —                           | —                     | $-76.4 \pm 1.2$               | $6.5 \pm 0.4$           |
| [32]     | rNav1.4 | WT        | steroid-denervated          | —                           | —                     | $-80.0 \pm 1.1$               | $5.0 \pm 0.9$           |
| [32]     | rNav1.5 | WT        | denervated                  | —                           | —                     | $-79.3 \pm 1.6$               | $9.5 \pm 0.7$           |
| [32]     | rNav1.5 | WT        | steroid-denervated          | —                           | —                     | $-82.3 \pm 1.1$               | $11.8 \pm 0.7$          |
| [33]     | hNav1.3 | 12v1      | —                           | $-12.1 \pm 0.9$             | $3.9 \pm 0.2$         | $-49.4 \pm 0.3$               | 6.6                     |
| [33]     | hNav1.3 | 12v2      | —                           | $-12.8 \pm 0.7$             | $4.2 \pm 0.1$         | $-48.5 \pm 0.5$               | 6.4                     |
| [33]     | hNav1.3 | 12v3      | —                           | $-11.7 \pm 0.7$             | $3.8 \pm 0.1$         | $-47.3 \pm 0.5$               | 6.4                     |
| [33]     | hNav1.3 | 12v4      | —                           | $-9.8 \pm 0.6$              | $3.7 \pm 0.1$         | $-47.3 \pm 0.3$               | 6.4                     |
| [34]     | rNav1.4 | WT        | $\beta$ 1                   | $-32.7 \pm 1.0$             | $5.4 \pm 0.2$         | $-76.8 \pm 0.7$               | $5.6 \pm 0.1$           |
| [34]     | rNav1.4 | I424C     | $\beta$ 1                   | $-31.2 \pm 1.5$             | $4.6 \pm 0.4$         | $-73.1 \pm 1.3$               | $5.5 \pm 0.3$           |
| [34]     | rNav1.4 | I425C     | $\beta$ 1                   | $-26.1 \pm 0.7$             | $7.6 \pm 0.2$         | $-74.4 \pm 0.6$               | $5.9 \pm 0.3$           |
| [34]     | rNav1.4 | F426C     | $\beta$ 1                   | $-33.6 \pm 1.7$             | $4.9 \pm 0.3$         | $-82.8 \pm 1.2$               | $6.1 \pm 0.3$           |
| [34]     | rNav1.4 | L427C     | $\beta$ 1                   | $-34.6 \pm 1.0$             | $5.2 \pm 0.3$         | $-74.0 \pm 1.8$               | $5.1 \pm 0.2$           |
| [34]     | rNav1.4 | G428C     | $\beta$ 1                   | $-32.3 \pm 1.0$             | $6.1 \pm 0.4$         | $-75.9 \pm 0.6$               | $5.3 \pm 0.1$           |
| [34]     | rNav1.4 | S429C     | $\beta$ 1                   | $-32.4 \pm 2.6$             | $4.5 \pm 0.3$         | $-74.0 \pm 1.1$               | $5.8 \pm 0.4$           |

| Citation | Channel | WT/mutant | Conditions | $V_{1/2}^{\text{act}}$ (mV) | $k^{\text{act}}$ (mV) | $V_{1/2}^{\text{inact}}$ (mV) | $k^{\text{inact}}$ (mV) |
|----------|---------|-----------|------------|-----------------------------|-----------------------|-------------------------------|-------------------------|
| [34]     | rNav1.4 | F430C     | $\beta 1$  | $-31.2 \pm 1.7$             | $5.1 \pm 0.4$         | $-81.2 \pm 1.1$               | $5.9 \pm 0.3$           |
| [34]     | rNav1.4 | Y431C     | $\beta 1$  | $-31.8 \pm 1.4$             | $4.2 \pm 0.5$         | $-70.8 \pm 1.1$               | $5.7 \pm 0.1$           |
| [34]     | rNav1.4 | L432C     | $\beta 1$  | $-29.5 \pm 1.7$             | $6.5 \pm 0.4$         | $-73.0 \pm 0.9$               | $6.0 \pm 0.2$           |
| [34]     | rNav1.4 | I433C     | $\beta 1$  | $-30.2 \pm 1.2$             | $6.3 \pm 0.4$         | $-74.7 \pm 1.2$               | $5.6 \pm 0.2$           |
| [34]     | rNav1.4 | N434C     | $\beta 1$  | $-30.2 \pm 1.1$             | $6.3 \pm 0.2$         | $-82.0 \pm 0.7$               | $6.1 \pm 0.2$           |
| [34]     | rNav1.4 | L435C     | $\beta 1$  | $-33.9 \pm 1.6$             | $4.5 \pm 0.3$         | $-77.8 \pm 1.7$               | $5.8 \pm 0.3$           |
| [34]     | rNav1.4 | I436C     | $\beta 1$  | $-24.9 \pm 1.2$             | $5.5 \pm 0.5$         | $-71.9 \pm 0.7$               | $5.1 \pm 0.3$           |
| [34]     | rNav1.4 | V779C     | $\beta 1$  | $-36.6 \pm 1.1$             | $4.6 \pm 0.2$         | $-82.5 \pm 1.5$               | $5.6 \pm 0.1$           |
| [34]     | rNav1.4 | M780C     | $\beta 1$  | $-29.1 \pm 2.0$             | $4.2 \pm 0.2$         | $-76.5 \pm 1.9$               | $6.3 \pm 0.2$           |
| [34]     | rNav1.4 | V781C     | $\beta 1$  | $-34.3 \pm 1.9$             | $4.5 \pm 0.3$         | $-74.9 \pm 1.8$               | $5.5 \pm 0.3$           |
| [34]     | rNav1.4 | I782C     | $\beta 1$  | $-33.5 \pm 2.0$             | $4.5 \pm 0.6$         | $-68.6 \pm 0.6$               | $5.1 \pm 0.3$           |
| [34]     | rNav1.4 | G783C     | $\beta 1$  | $-34.2 \pm 1.4$             | $4.1 \pm 0.2$         | $-79.4 \pm 2.7$               | $6.2 \pm 0.2$           |
| [34]     | rNav1.4 | N784C     | $\beta 1$  | $-33.8 \pm 1.0$             | $4.5 \pm 0.4$         | $-74.1 \pm 1.1$               | $6.0 \pm 0.3$           |
| [34]     | rNav1.4 | L785C     | $\beta 1$  | $-26.0 \pm 1.4$             | $4.0 \pm 0.2$         | $-74.3 \pm 0.8$               | $5.4 \pm 0.1$           |
| [34]     | rNav1.4 | V786C     | $\beta 1$  | $-35.9 \pm 1.6$             | $4.1 \pm 0.7$         | $-69.1 \pm 1.6$               | $4.4 \pm 0.2$           |
| [34]     | rNav1.4 | V787C     | $\beta 1$  | $-27.3 \pm 1.2$             | $6.5 \pm 0.5$         | $-76.3 \pm 0.6$               | $5.5 \pm 0.1$           |
| [34]     | rNav1.4 | L788C     | $\beta 1$  | $-33.4 \pm 1.8$             | $4.3 \pm 0.3$         | $-77.4 \pm 0.8$               | $5.7 \pm 0.2$           |
| [34]     | rNav1.4 | N789C     | $\beta 1$  | $-28.5 \pm 1.0$             | $4.2 \pm 0.2$         | $-74.3 \pm 0.9$               | $5.9 \pm 0.2$           |
| [34]     | rNav1.4 | L790C     | $\beta 1$  | $-33.1 \pm 1.7$             | $5.0 \pm 0.5$         | $-72.6 \pm 1.0$               | $5.3 \pm 0.2$           |
| [34]     | rNav1.4 | F791C     | $\beta 1$  | $-35.0 \pm 0.9$             | $5.4 \pm 0.5$         | $-74.1 \pm 1.0$               | $5.1 \pm 0.1$           |
| [35]     | rNav1.4 | WT        |            | $-32.1 \pm 0.8$             | $11.5 \pm 0.7$        | $-88.5 \pm 2.4$               | $6.5 \pm 0.3$           |
| [35]     | rNav1.4 | I687M     |            | $-49.2 \pm 1.0$             | $9.6 \pm 0.9$         | $-89.2 \pm 2.1$               | $7.1 \pm 0.2$           |



| Citation | Channel | WT/mutant    | Conditions      | $V_{1/2}^{\text{act}}$ (mV) | $k^{\text{act}}$ (mV) | $V_{1/2}^{\text{inact}}$ (mV) | $k^{\text{inact}}$ (mV) |
|----------|---------|--------------|-----------------|-----------------------------|-----------------------|-------------------------------|-------------------------|
| [35]     | rNav1.4 | I689T        |                 | $-41.6 \pm 1.7$             | $10.5 \pm 1.6$        | $-82.1 \pm 2.1$               | $6.9 \pm 0.5$           |
| [35]     | rNav1.4 | I687M/N784K  |                 | $-54.2 \pm 1.7$             | $10.8 \pm 1.6$        | $-90.8 \pm 1.8$               | $5.6 \pm 0.1$           |
| [35]     | rNav1.4 | I687M/F1278I |                 | $-40.2 \pm 1.5$             | $8.9 \pm 1.4$         | $-85.1 \pm 4.6$               | $6.4 \pm 0.3$           |
| [36]     | rNav1.4 | WT           | $\beta 1$       | $-31.4 \pm 1.0$             | $9.4 \pm 0.8$         | $-73.3 \pm 0.1$               | $5.0 \pm 0.1$           |
| [36]     | rNav1.4 | 3-C          | $\beta 1$       | $-14.5 \pm 1.2$             | $11.7 \pm 1.0$        | $-77.0 \pm 0.1$               | $5.2 \pm 0.1$           |
| [37]     | hNav1.5 | WT           |                 | $-53.3 \pm 2.7$             | $6.7 \pm 0.9$         | $-90.0 \pm 2.4$               | $7.1 \pm 0.3$           |
| [37]     | hNav1.5 | WT           | UVA irradiated  | $-35.3 \pm 4.9$             | $13.8 \pm 1.9$        | $-86.8 \pm 2.3$               | $12.3 \pm 0.7$          |
| [38]     | rNav1.5 | WT           |                 | —                           | —                     | $-72.7 \pm 1.1$               | $5.3 \pm 0.3$           |
| [38]     | rNav1.5 | WT           | ATX-II (10 nM)  | —                           | —                     | $-76.1 \pm 1.3$               | $8.2 \pm 0.4$           |
| [38]     | rNav1.5 | WT           | ATX-II (50 nM)  | —                           | —                     | $-79.1 \pm 0.9$               | $7.2 \pm 0.4$           |
| [38]     | rNav1.5 | WT           | ATX-II (200 nM) | —                           | —                     | $-84.4 \pm 2.1$               | $8.9 \pm 0.6$           |
| [39]     | mNav1.9 | WT           |                 | $-56.1 \pm 1.8$             | $5.3 \pm 0.2$         | $-71.1 \pm 2.8$               | $8.6 \pm 1.2$           |
| [39]     | mNav1.9 | WT           | PGE2            | $-64.0 \pm 1.8$             | $4.8 \pm 0.4$         | $-82.6 \pm 2.8$               | $11.3 \pm 1.5$          |
| [40]     | rNav1.8 | shRNA        | EGFP            | $-20.4 \pm 8.3$             | $6.4 \pm 1.9$         | —                             | —                       |
| [40]     | rNav1.8 | WT           | EGFP            | $-23.2 \pm 2.6$             | $5.3 \pm 0.6$         | —                             | —                       |
| [40]     | rNav1.8 | WT           |                 | $-24.1 \pm 2.5$             | $4.9 \pm 1.1$         | —                             | —                       |

- 
- [1] McCormick KA, Srinivasan J, White K, Scheuer T, Catterall WA (1999) The extracellular domain of the  $\beta 1$  subunit is both necessary and sufficient for  $\beta 1$ -like modulation of sodium channel gating. *J Biol Chem* 274:32638–32646.
- [2] Smith RD, Goldin AL (1998) Functional analysis of the rat  $\beta 1$  sodium channel in xenopus oocytes. *J Neurosci* 18:811–820.
- [3] Spampanato J, Escayg A, Meisler MH, Goldin AL (2001) Functional effects of two voltage-gated sodium channel mutations that cause generalized epilepsy with febrile seizures plus type 2. *J Neurosci* 21:7481–7490.
- [4] Patton DE, Isom LL, Catterall WA, Goldin AL (1994) The adult rat brain  $\beta 1$  subunit modifies activation and inactivation gating of multiple sodium channel alpha subunits. *J Biol Chem* 269:17649–17655.
- [5] Smith MR, Smith RD, Plummer NW, Meisler MH, Goldman AL (1998) Functional analysis of the mouse *scn8a* sodium channel. *J Neurosci* 18:6093–6102.
- [6] Ulbricht W (2005) Sodium channel inactivation: molecular determinants and modulation. *Physiol Rev* 85:1271–1301.
- [7] Cummins TR, Aglieco F, Renganathan M, Herzog RI, Dib-Hajj SD, et al. (2001) Nav1.3 sodium channels: rapid repriming and slow closed-state inactivation display quantitative differences after expression in a mammalian cell line and in spinal sensory neurons. *J Neurosci* 21:5952–5961.
- [8] Burbidge SA, Dale TJ, Powell AJ, Whitaker WR, Xie XM, et al. (2002) Molecular cloning, distribution and functional analysis of the *na(v)1.6* voltage-gated sodium channel from human brain. *Molec Brain Res* 103:80–90.
- [9] Cummins TR, Dib-Hajj SD, Waxman SG (2004) Electrophysiological properties of mutant *nav1.7* sodium channels in a painful inherited neuropathy. *J Neurosci* 24:8232–8236.
- [10] Chen YH, Dale TJ, Romanos MA, Whitaker WR, Xie XM, et al. (2000) Cloning, distribution and functional analysis of the type iii sodium channel from human brain. *Eur J Neurosci* 12:4281–4289.
- [11] Jurkat-Rott K, Mitrovic N, Hang C, Kouzmekine A, Iaizzo P, et al. (2000) Voltage-sensor sodium channel mutations cause hypokalemic periodic paralysis type 2 by enhanced inactivation.

- tion and reduced current. *Proc Natl Acad Sci* 97:9549–9554.
- [12] Mohler PJ, Rivolta I, Napolitano C, LeMaillet G, Lambert S, et al. (2004) Nav1.5 e1053k mutation causing brugada syndrome blocks binding to ankyrin-g and expression of nav1.5 on the surface of cardiomyocytes. *Proc Natl Acad Sci* 101:17533–17538.
- [13] Herzog R, Cummins TR, Ghassemi F, Dib-Hajj SD, Waxman SG (2003) Distinct repriming and closed-state inactivation kinetics of nav1.6 and nav1.7 sodium channels in mouse spinal sensory neurons. *J Physiol* 551:741–750.
- [14] Lossin C, Wang DW, Rhodes TH, Vanoye CG, George AL (2002) Molecular basis of an inherited epilepsy. *Neuron* 34:877–884.
- [15] Rhodes TH, Lossin C, Vanoye CG, Wang DW, George AL (2004) Noninactivating voltage-gated sodium channels in severe myoclonic epilepsy of infancy. *Proc Natl Acad Sci* 101:11147–11152.
- [16] Tan HL, Bink-Boelkens MTE, Bezzina CR, Viswanathan PC, Beaufort-Krol GCM, et al. (2001) A sodium-channel mutation causes isolated cardiac conduction disease. *Nature* 409:1043–1047.
- [17] Morgan K, Stevens EB, Shah B, Cox PJ, Dixon AK, et al. (2000)  $\beta 3$ : An additional auxiliary subunit of the voltage-sensitive sodium channel that modulates channel gating with distinct kinetics. *Proc Natl Acad Sci* 97:2308–2313.
- [18] Xiao Y, Wright SN, Wang GK, Morgan JP, Leaf A (2000) Coexpression with  $\beta 1$ -subunit modifies the kinetics and fatty acid block of hh1(alpha) na(+) channels. *Am J Physiol* 279:H35–H46.
- [19] Xie X, Dale TJ, John VH, Cater HL, Peakman TC, et al. (2001) Electrophysiological and pharmacological properties of the human brain type iia na+ channel expressed in a stable mammalian cell line. *Eur J Physiol* 441:425–433.
- [20] Baker MD, Chandra SY, Ding Y, Waxman SG, Wood JN (2003) Gtp-induced tetrodotoxin-resistant na+ current regulates excitability in mouse and rat small diameter sensory neurones. *J Physiol* 548:373–382.
- [21] O’Leary ME, Digregorio M, Chahine M (2003) Closing and inactivation potentiate the co-ethylene inhibition of cardiac sodium channels by distinct mechanisms. *Mol Pharmacol* 64:1575–1585.
- [22] Vijayaragavan K, Powell AJ, Kinghorn IJ, Chahine M (2004) Role of auxiliary  $\beta 1$ -,  $\beta 2$ -, and

- $\beta$ 3-subunits and their interaction with na(v)1.8 voltage-gated sodium channel. *Biochem & Biophys Res Comm* 319:531–540.
- [23] Chevrier P, Vijayaragavan K, Chahine M (2004) Differential modulation of nav1.7 and nav1.8 peripheral nerve sodium channels by the local anesthetic lidocaine. *Brit J Pharmacol* 142:576–584.
- [24] Vijayaragavan K, Boutjdir M, Chahine M (2003) Modulation of nav1.7 and nav1.8 peripheral nerve sodium channels by protein kinase a and protein kinase c. *J Neurophysiol* 91:1556–1569.
- [25] Coste B, Osorio N, Padilla F, Crest M, Delmas P (2004) Gating and modulation of presumptive nav1.9 channels in enteric and spinal sensory neurons. *Mol Cell Neurosci* 26:123–134.
- [26] Liu C, Dib-Hajj SD, Renganathan M, Cummins T, Waxman SG (2003) Modulation of the cardiac sodium channel nav1.5 by fibroblast growth factor homologous factor 1b. *J Biol Chem* 278:1029–1036.
- [27] Satin J, Kehat I, Caspi O, Huber I, Arbel G, et al. (2004) Mechanism of spontaneous excitability in human embryonic stem cell derived cardiomyocytes. *J Physiol* 559:479–496.
- [28] McNulty MM, Hanck DA (2004) State-dependent mibefradil block of na<sup>+</sup> channels. *Mol Pharmacol* 66:1652–1661.
- [29] Wehrens XHT, Rossenbacker T, Jongbloed RJ, Gewillig M, Heidbuchel H, et al. (2003) A novel mutation l619f in the cardiac na<sup>+</sup> channel scn5a associated with long-qt syndrome (lqt3): a role for the i-ii linker in inactivation gating. *Hum Mut* 21:552.
- [30] Ferrera L, Moran O (2006)  $\beta$ 1-subunit modulates the nav1.4 sodium channel by changing the surface charge. *Exp Brain Res* 172:139–150.
- [31] Filatov GN, Pinter MJ, Rich MM (2005) Resting potential-dependent regulation of the voltage sensitivity of sodium channel gating in rat skeletal muscle in vivo. *J Gen Physiol* 126:161–172.
- [32] Filatov GN, Rich MM (2004) Hyperpolarized shifts in the voltage dependence of fast inactivation of nav1.4 and nav1.5 in a rat model of critical illness myopathy. *J Physiol* 559:813–820.
- [33] Thimmapaya R, Neelands T, Niforatos W, Davis-Taber RA, Choi W, et al. (2005) Distribution and functional characterization of human nav1.3 splice variants. *Eur J Neurosci* 22:1–9.
- [34] Kondratiev A, Tomaselli GF (2003) Altered gating and local anesthetic block mediated by residues in the i-s6 and ii-s6 transmembrane segments of voltage-dependent na<sup>+</sup> channels. *Mol Pharmacol* 64:741–752.
- [35] Wang SY, Barile M, Wang GK (2001) A phenylalanine residue at segment d3-s6 in nav1.4

- voltage-gated na(+) channels is critical for pyrethroid action. *Mol Pharmacol* 60:620–628.
- [36] Wang G, Wang S (2003) Veratridine block of rat skeletal muscle nav1.4 sodium channels in the inner vestibule. *J Physiol* 548:667–675.
- [37] Wang GK, Wang SY (2002) Modifications of human cardiac sodium channel gating by uva light. *J Membrane Biol* 189:153–165.
- [38] Oliveira JS, Redaelli E, Zaharenko AJ, Cassulini RR, Pimenta KKDC, et al. (2004) Binding specificity of sea anemone toxins to nav 1.1-1.6 sodium channels: unexpected contributions from differences in the iv/s3-s4 outer loop. *J Biol Chem* 279:33323–33335.
- [39] Rush AM, Waxman SG (2004) Pge2 increases the tetrodotoxin-resistant nav1.9 sodium current in mouse drg neurons via g-proteins. *Brain Res* 1023:264–271.
- [40] Mikami M, Yang J (2005) Short hairpin rna-mediated selective knockdown of nav1.8 tetrodotoxin-resistant voltage-gated sodium channel in dorsal root ganglion neurons. *Anesthesiology* 103:828–836.
